# Supplementary material for: Prognostic Fifteen-Gene Signature for Early Stage Pancreatic Ductal Adenocarcinoma
Source: PubMed Central journal article supplement (PMC4527782; doi:10.1371/journal.pone.0133562), 2015-08-06

**S1 Fig.** Flow chart of data analysis

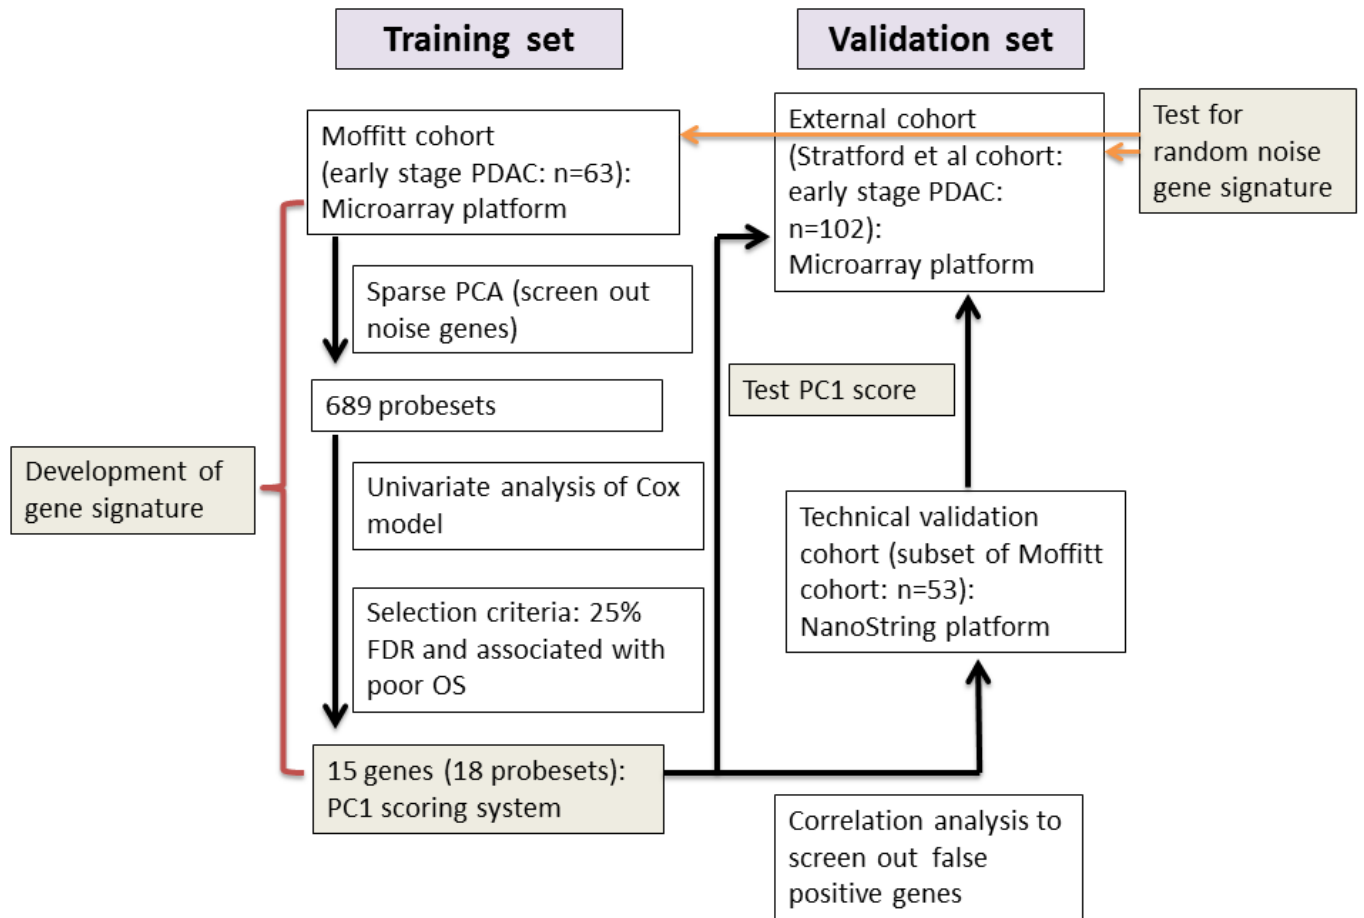

Supplement: pone.0133562.s001.pdf [file pone.0133562.s001.pdf]
