# Supplementary material for: Prognostic Fifteen-Gene Signature for Early Stage Pancreatic Ductal Adenocarcinoma
Source: PubMed Central journal article supplement (PMC4527782; doi:10.1371/journal.pone.0133562), 2015-08-06

**S2 Fig.** Principal component analysis of the 15-gene signature. Variation of the first five principal components in the two datasets: **A)** Moffitt cohort and **B)** Stratford et al cohort.

**(A)**

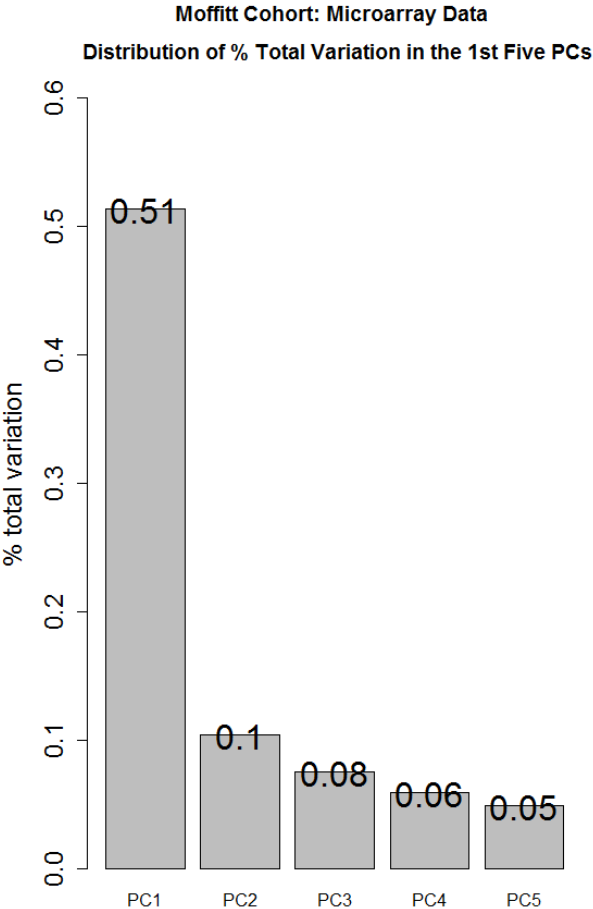

**(B)**

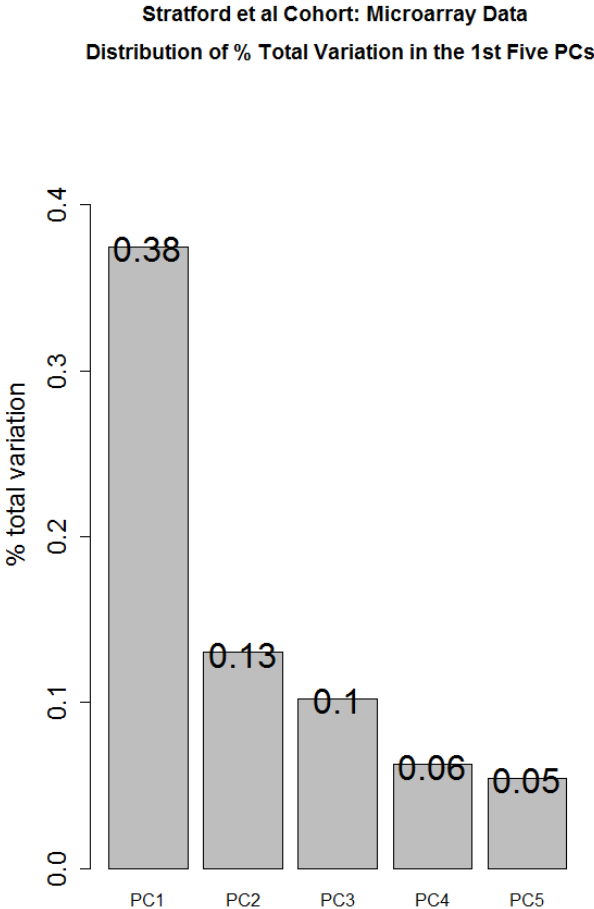

Supplement: pone.0133562.s002.pdf [file pone.0133562.s002.pdf]
