# Supplementary material for: Prognostic Fifteen-Gene Signature for Early Stage Pancreatic Ductal Adenocarcinoma
Source: PubMed Central journal article supplement (PMC4527782; doi:10.1371/journal.pone.0133562), 2015-08-06
Supplement: pone.0133562.s006.pdf [file pone.0133562.s006.pdf]

**S1 Table.** Housekeeping genes (19 genes) for NanoString validation

| Name     | Accession      |
|----------|----------------|
| TOMM20   | NM_014765.2    |
| UBE3A    | NM_000462.2    |
| ATXN1L   | NM_001137675.2 |
| JUND     | NM_005354.4    |
| KY       | NM_178554.4    |
| CCDC73   | NM_001008391.3 |
| PFDN1    | NM_002622.4    |
| RPS3     | NM_001005.4    |
| WNK2     | NM_006648.3    |
| SDHAF2   | NM_017841.2    |
| MAPK14   | NM_001315.1    |
| ZCCHC14  | NM_015144.2    |
| RPS25    | NM_001028.2    |
| NOXA1    | NM_006647.1    |
| TPT1     | NM_003295.2    |
| RAB3GAP1 | NM_001172435.1 |
| RPS19    | NM_001022.3    |
| RPL17    | NM_000985.3    |
| RPL36    | NM_033643.2    |
