# Supplementary material for: Prognostic Fifteen-Gene Signature for Early Stage Pancreatic Ductal Adenocarcinoma
Source: PubMed Central journal article supplement (PMC4527782; doi:10.1371/journal.pone.0133562), 2015-08-06
Supplement: pone.0133562.s008.pdf [file pone.0133562.s008.pdf]

**S3 Table.** Analysis of the first three principal components of the 15-gene signature (18 probesets) and 689 probesets after sparse PCA filtering for the association with OS using Cox proportional hazards model in the Moffitt cohort (n=63)

|                                                                                                               | Model       | Log-rank test statistics | Degree of freedom | P value |
|---------------------------------------------------------------------------------------------------------------|-------------|--------------------------|-------------------|---------|
| 15-gene signature (18 probesets)                                                                              | PC1         | 12.02                    | 1                 | 0.0005  |
|                                                                                                               | PC1+PC2     | 13.74                    | 2                 | 0.001   |
|                                                                                                               | PC1+PC2+PC3 | 16.40                    | 3                 | 0.0009  |
| The PC1 accounted for 51% total variation while PC2 and PC3 explained only 10% and 8% variation, respectively |             |                          |                   |         |
| 689 probesets                                                                                                 | PC1         | 2.52                     | 1                 | 0.11    |
|                                                                                                               | PC1+PC2     | 2.73                     | 2                 | 0.26    |
|                                                                                                               | PC1+PC2+PC3 | 2.74                     | 3                 | 0.43    |
| The PC1 accounted for 45% total variation while PC2 and PC3 explained only 9% and 6% variation, respectively  |             |                          |                   |         |
