# Supplementary material for: Prognostic Fifteen-Gene Signature for Early Stage Pancreatic Ductal Adenocarcinoma
Source: PubMed Central journal article supplement (PMC4527782; doi:10.1371/journal.pone.0133562), 2015-08-06
Supplement: pone.0133562.s010.pdf [file pone.0133562.s010.pdf]

**S5 Table.** Correlation analysis of microarray and NanoString data at the Moffitt cohort (N=53).

| Gene Name | Correlation between Micorarray and NanoString |
|-----------|-----------------------------------------------|
| IGF2BP3   | 0.90                                          |
| SERPINB5  | 0.88                                          |
| UCA1      | 0.87                                          |
| SCEL      | 0.87                                          |
| PPBP      | 0.83                                          |
| SLC2A1    | 0.81                                          |
| KIF14     | 0.77                                          |
| RTKN2     | 0.72                                          |
| CAPN8     | 0.66                                          |
| C6orf15   | 0.66                                          |
| TMPRSS3   | 0.61                                          |
| KRT6A     | 0.56                                          |
| SLC45A3   | 0.39                                          |
| HIST1H3H  | 0.33                                          |
| PMAIP1    | 0.02                                          |
