# Supplementary material for: Prognostic Fifteen-Gene Signature for Early Stage Pancreatic Ductal Adenocarcinoma
Source: PubMed Central journal article supplement (PMC4527782; doi:10.1371/journal.pone.0133562), 2015-08-06
Supplement: pone.0133562.s011.pdf [file pone.0133562.s011.pdf]

**S6 Table.** PC1 loading coefficients of the 15-gene signature.

| Probeset ID                | PC1 loading coefficients | Gene Name | Gene Level: PC1 loading coefficients |            |
|----------------------------|--------------------------|-----------|--------------------------------------|------------|
|                            |                          |           | Microarray                           | NanoString |
| merck-NM_014070_a_at       | 0.157                    | C6ORF15   | 0.183                                | 0.163      |
| merck-AI921300_a_at        | 0.178                    | CAPN8     | 0.194                                | 0.243      |
| merck-ENST00000377383_at   | 0.220                    | HIST1H3H  | 0.252                                | 0.183      |
| merck-NM_006547_at         | 0.234                    | IGF2BP3   | 0.260                                | 0.316      |
| merck-BX648488_s_at        | 0.237                    |           |                                      |            |
| merck2-BC098582_at         | 0.261                    | KIF14     | 0.289                                | 0.321      |
| merck2-NM_005554_at        | 0.247                    | KRT6A     | 0.271                                | 0.183      |
| merck-ENST00000269518_a_at | 0.247                    | PMAIP1    | 0.277                                | 0.052      |
| merck-NM_002704_at         | 0.157                    | PPBP      | 0.183                                | 0.139      |
| merck-BI768238_a_at        | 0.256                    | RTKN2     | 0.290                                | 0.338      |
| merck-NM_003843_a_at       | 0.243                    | SCEL      | 0.275                                | 0.287      |
| merck-NM_002639_at         | 0.271                    | SERPINB5  | 0.296                                | 0.312      |
| merck-BQ217236_a_at        | 0.274                    |           |                                      |            |
| merck-AF086216_at          | 0.269                    |           |                                      |            |
| merck-NM_006516_at         | 0.281                    | SLC2A1    | 0.311                                | 0.333      |
| merck-BX640973_at          | 0.271                    | SLC45A3   | 0.304                                | 0.296      |
| merck2-NM_032405_at        | 0.208                    | TMPRSS3   | 0.233                                | 0.297      |
| merck-DQ343132_s_at        | 0.170                    | UCA1      | 0.200                                | 0.202      |
